# Supplementary material for: Vaccinomics to Design a Multiepitope Vaccine against Legionella pneumophila
Source: Hindawi journal article supplement (doi:10.1155/2022/4975721), 2022-01-01
Supplement: f1 [file 4975721.f1.pdf]

**Table S 1:** Final MHC-I epitopes selected on the basis of different parameters

| Protein                              | Epitopes     | Position | alleles                                                  | antigenicity | immunogenicity |
|--------------------------------------|--------------|----------|----------------------------------------------------------|--------------|----------------|
| YARHG domain-containing protein      | KYIWDLRHF    | 5-7      | HLA-A*23:01<br>HLA-A*24:02                               | 0.6046       | 0.33983        |
|                                      | FPPLATVNI    | 3-38     | HLA-B*51:01<br>HLA-B*53:01                               | 0.9477       | 0.09094        |
|                                      | SNKELRFLR    | 5-49     | HLA-A*33:01<br>HLA-A*31:01<br>HLA-A*68:01                | 0.5345       | 0.16099        |
|                                      | CSEIDPKADY   | 4-35     | HLA-A*01:01<br>HLA-A*30:02                               | 1.4910       | 0.0202         |
|                                      | FPPLATVNIH   | 3-38     | HLA-B*53:01<br>HLA-B*35:01                               | 1.1473       | 0.1723         |
| TPR-REGION domain-containing protein | QLKAFSWSDLWF | 1-17     | HLA-B*57:01<br>HLA-B*58:01<br>HLA-A*32:01                | 0.5811       | 0.11781        |
|                                      | MMWRVLAIVA   | 1-1      | HLA-A*02:01                                              | 0.5143       | 0.32665        |
| Uncharacterized protein              | FSFLFLFSTFTF | 1-6      | HLA-A*23:01<br>HLA-A*24:02<br>HLA-B*46:01<br>HLA-B*15:02 | 1.8775       | 0.24096        |

|              |      |                                                                         |        |         |
|--------------|------|-------------------------------------------------------------------------|--------|---------|
|              |      | HLA-A*29:02<br>HLA-C*07:02<br>HLA-B*58:01<br>HLA-B*35:01<br>HLA-B*57:01 |        |         |
| CLFSFLFLFSTF | 1-4  | HLA-B*46:01<br>HLA-A*23:01<br>HLA-A*24:02<br>HLA-A*29:02                | 1.7732 | 0.07119 |
| SFLFLFSTFTFS | 1-7  | HLA-A*23:01<br>HLA-A*24:02<br>HLA-B*15:02<br>HLA-C*07:02                | 1.2515 | 0.30546 |
| LFSFLFLFSTFT | 1-5  | HLA-B*46:01<br>HLA-A*23:01<br>HLA-A*24:02                               | 1.6839 | 0.21593 |
| FLFLFSTFTFSQ | 1-8  | HLA-A*23:01<br>HLA-B*15:02<br>HLA-A*24:02<br>HLA-C*07:02                | 1.2934 | 0.17022 |
| LFLFSTFTFSQN | 9-20 | HLA-A*23:01<br>HLA-A*24:02                                              | 0.7424 | 0.0456  |
| NVSGRTLRLDLW | 1-49 | HLA-                                                                    | 2.4487 | 0.11    |

|                                |              |      |                                                                         |        |         |
|--------------------------------|--------------|------|-------------------------------------------------------------------------|--------|---------|
|                                |              |      | B*58:01                                                                 |        |         |
| SPOR domain-containing protein | MFRINLKRYVAL | 1-1  | HLA-B*08:01<br>HLA-C*06:02<br>HLA-B*39:01<br>HLA-C*07:01                | 0.6512 | 0.02824 |
|                                | KRYVALLFIITL | 1-7  | HLA-B*27:05<br>HLA-A*23:01<br>HLA-A*24:02                               | 0.9141 | 0.43112 |
|                                | LPEFTNYNYQWK | 5-1  | HLA-B*53:01                                                             | 0.6270 | 0.20008 |
|                                | KPQWLLSLGYEY | 6-27 | HLA-A*29:02<br>HLA-A*30:02<br>HLA-B*35:01                               | 1.1161 | 0.07907 |
| Sell repeat protein            | GFYWYLNTPEGY | 2-36 | HLA-A*29:02<br>HLA-C*14:02<br>HLA-A*30:02<br>HLA-B*15:02<br>HLA-C*07:02 | 1.0450 | 0.33265 |
|                                | NVDAQVLLAGFY | 2-27 | HLA-A*01:01<br>HLA-A*30:02<br>HLA-A*26:01                               | 0.7063 | 0.0862  |
|                                | AQFNLADMYFYG | 5-29 | HLA-A*30:02<br>HLA-A*29:02                                              | 0.7846 | 0.0862  |
|                                | VAADPVKAYAWF | 6-29 | HLA-C*05:01<br>HLA-                                                     | 0.6489 | 0.05148 |

|                                                            |               |       |                                                                                                                |               |                |
|------------------------------------------------------------|---------------|-------|----------------------------------------------------------------------------------------------------------------|---------------|----------------|
|                                                            |               |       | B*58:01                                                                                                        |               |                |
| Metalloprotease<br>PmbA                                    | GFSVDVIRMGEVE | 1-47  | HLA-<br>B*46:01<br>HLA-<br>C*08:02<br>HLA-<br>C*15:02                                                          | 1.9821        | 0.06956        |
|                                                            | FSVDVIRMGEVET | 1-48  | HLA-<br>B*46:01<br>HLA-<br>C*08:02<br>HLA-<br>C*15:02                                                          | 1.7369        | 0.17591        |
|                                                            | YHSWDITPQQAI  | 3-9   | HLA-<br>B*38:01<br>HLA-<br>B*39:01                                                                             | 0.9313        | 0.16345        |
|                                                            | HPDLDLYHSWDI  | 3-3   | HLA-<br>B*53:01                                                                                                | 1.1002        | 0.07891        |
|                                                            | NHPDLDLYHSWD  | 3-2   | HLA-<br>B*53:01<br>HLA-<br>B*38:01                                                                             | 0.6182        | 0.03537        |
| Peptide ABC<br>transporter<br>substrate-binding<br>protein | FAPVPWEADLFY  | 5-12  | HLA-<br>B*35:03<br>HLA-<br>B*35:01<br>HLA-<br>B*53:01<br>HLA-<br>A*29:02<br>HLA-<br>C*03:03<br>HLA-<br>B*46:01 | 0.5302        | 0.45836        |
|                                                            | PFFAPVPWEADL  | 5-10  | HLA-<br>B*35:03<br>HLA-<br>C*03:03<br>HLA-<br>C*07:02                                                          | 1.0915        | 0.4519         |
|                                                            | RRIWNKPVFWPL  | 12-15 | HLA-<br>B*27:05<br>HLA-<br>A*32:01<br>HLA-                                                                     | <b>0.5926</b> | <b>0.36985</b> |

|  |              |       |             |                                                                     |         |  |
|--|--------------|-------|-------------|---------------------------------------------------------------------|---------|--|
|  |              |       |             | B*48:01<br>HLA-C*07:02<br>HLA-B*08:01<br>HLA-A*02:06<br>HLA-B*39:01 |         |  |
|  | RRIWNKPVFWPL | 12-15 | HLA-A*32:01 | 0.5926                                                              | 0.36985 |  |

**Table S 2: Final MHC-II epitopes selected on the basis of different parameters**

| protein                           | SN | HTL epitopes         | Position | alleles                                                                             | Antigenicity | IFN-<br>Y | IL-4         | IL-10    |
|-----------------------------------|----|----------------------|----------|-------------------------------------------------------------------------------------|--------------|-----------|--------------|----------|
| YARHG domain - containing protein | 1  | DAYFWKTTFFP<br>LATV  | 150-164  | HLA-DPA1*01:03/DPB1*04:01                                                           | 0.5734       | positive  | IL-4 inducer | negative |
|                                   | 2  | AYFWKTTFFPPL<br>ATVN | 151-165  | HLA-DPA1*01:03/DPB1*04:01<br>HLA-DPA1*02:01/DPB1*14:01                              | 0.6557       | positive  | IL-4 inducer | negative |
|                                   | 3  | DAYFWKTTFFP<br>LATV  | 204-218  | HLA-DPA1*02:01/DPB1*14:01<br>HLA-DPA1*02:01/DPB1*01:01<br>HLA-DPA1*02:01/DPB1*05:01 | 0.5734       | positive  | IL-4 inducer | negative |
|                                   | 4  | YFWKTTFFPPLA<br>TVNI | 152-166  | HLA-DPA1*02:01/DPB1*14:01                                                           | 0.8325       | Positive  | IL-4 inducer | negative |
| SPOR domain - contain             | 1  | GIYYSHFFNMD<br>INGQ  | 161-175  | HLA-DRB1*04:05<br>HLA-DPA1*01:03/DPB1*04:01                                         | 1.1525       | positive  | IL-4 inducer | Negative |

|                |   |                     |             |                                                                                         |        |              |                     |              |
|----------------|---|---------------------|-------------|-----------------------------------------------------------------------------------------|--------|--------------|---------------------|--------------|
| ing<br>protein | 2 | VGIYYSHFFNM<br>DING | 160-<br>174 | HLA-DRB1*04:05<br>HLA-<br>DPA1*01:03/DPB<br>1*04:01<br>LA-<br>DPA1*01:03/DPB<br>1*02:01 | 1.0893 | positi<br>ve | IL4-<br>indu<br>cer | Negat<br>ive |
|----------------|---|---------------------|-------------|-----------------------------------------------------------------------------------------|--------|--------------|---------------------|--------------|

**Table S 3: Final B-cell epitopes selected on the basis of different parameters**

| Protein                         | B cell Epitope   | Position | Score | Antigenicity |
|---------------------------------|------------------|----------|-------|--------------|
| YARHG domain-containing protein | DGSIGHTRLEVIPNTP | 196      | 0.92  | 0.8371       |
|                                 | LIRISGRNLNEPHMNG | 54       | 0.80  | 0.7503       |
|                                 |                  |          |       |              |
| Uncharacterized protein         | GLAIIADYPYVNGVTG | 101      | 0.91  | 0.5921       |
|                                 | YHTIQNVSGRTLRLDL | 44       | 0.85  | 1.5483       |
|                                 | VDKIVAGTANVQSDNV | 61       | 0.78  | 0.7981       |
|                                 | GRTLRLDLWVDKIVAG | 52       | 0.73  | 1.1531       |
|                                 | FSFLFLFSTFTFSQNF | 6        | 0.69  | 1.4032       |
|                                 | DYPYVNGVTGQFSIHY | 107      | 0.52  | 0.7611       |
|                                 |                  |          |       |              |
| SPOR domain-containing protein  | IGGQETTPDDQFTVNN | 164      | 0.92  | 1.1461       |
|                                 | HTTTVFAYQLGAGLDW | 309      | 0.78  | 0.7868       |
|                                 | LFITLNLHCINVAFS  | 13       | 0.73  | 1.6755       |
|                                 | SHFFNMDINGQVIQYS | 225      | 0.51  | 1.0093       |
| Sell repeat protein             | DGIGVAADPVKAYAWF | 315      | 0.83  | 0.8210       |
|                                 | AGFYWYLNTPEGYKKA | 95       | 0.77  | 0.8607       |
|                                 | QGNSNAALAIGYNYDT | 156      | 0.70  | 0.9605       |
| Metalloprotease                 | MQRDYDYTTARNAENL | 203      | 0.85  | 0.6989       |

|                                                            |                      |     |      |        |
|------------------------------------------------------------|----------------------|-----|------|--------|
| PmbA                                                       | HNLTINPTCGDLGDLL     | 351 | 0.83 | 0.7878 |
|                                                            | KGALGSAPFDGEGVPT     | 300 | 0.80 | 0.5064 |
|                                                            | SWDITPQQAIDLALKC     | 131 | 0.78 | 1.5251 |
|                                                            | KNHPDLLDYHSDWITP     | 121 | 0.78 | 1.0760 |
|                                                            | PFDGEGVPTRPNVLVE     | 307 | 0.76 | 0.7194 |
|                                                            | AVNYDRGFSVDVRMG<br>E | 41  | 0.72 | 1.0010 |
|                                                            | AENLVAAELIAAKAVE     | 215 | 0.55 | 0.5576 |
| Peptide ABC<br>transporter<br>substrate-binding<br>protein | KMRIGHAQIFSWGWNA     | 550 | 0.92 | 1.2577 |
|                                                            | PPGIFGYKEGKEGINP     | 451 | 0.92 | 0.6111 |
|                                                            | MVEAGYPGGIDPKTGK     | 488 | 0.87 | 1.3027 |
|                                                            | WGWNADYDPDENFLFL     | 561 | 0.84 | 0.5314 |
|                                                            | PVFWPLGVLFGLLAL      | 681 | 0.81 | 0.7898 |
|                                                            | DMSGISADSFDQAIHI     | 357 | 0.77 | 0.8478 |
|                                                            | YLDAQGNPVPAGDNTK     | 90  | 0.74 | 0.6330 |
|                                                            | DFKYTGTRRELIIDYI     | 155 | 0.72 | 0.6941 |
|                                                            | YKRPYELIPLTATWLP     | 71  | 0.67 | 0.5218 |
|                                                            | DLNIRATLYNRFQEKM     | 536 | 0.62 | 1.2516 |
|                                                            | NKRARKLRQAISIAVN     | 415 | 0.58 | 0.9616 |
|                                                            | VLLALVIPLFIAYLKK     | 692 | 0.57 | 1.1225 |
